# Supplementary material for: Polydopamine functionalized transparent conductive cellulose nanopaper with long-term durability
Source: Royal Society of Chemistry journal article supplement (doi:10.1039/c6tc04928a), 2016-12-06
Supplement: c6tc04928a1.pdf [file c6tc04928a1.pdf]

## Electronic Supplementary Information

### **Polydopamine Functionalized Transparent Conductive Cellulose Nanopaper with Long-Term Durability**

Yongxiang Su,<sup>a</sup> Yafei Zhao,<sup>b</sup> Huaiyu Zhang,<sup>c</sup> Xin Feng,<sup>b,\*</sup> Liyi Shi<sup>b</sup> and Jianhui Fang<sup>a,\*</sup>

<sup>a</sup> Department of Chemistry, College of Science, Shanghai University, Shanghai  
200444, P. R. China.

<sup>b</sup> Research Center of Nano Science and Technology, Shanghai University, Shanghai  
200444, P. R. China.

<sup>c</sup> School of Environmental and Chemical Engineering, Shanghai University, Shanghai  
200444, P. R. China.

\* Corresponding Author: [fengxin@shu.edu.cn](mailto:fengxin@shu.edu.cn); [jhfang@shu.edu.cn](mailto:jhfang@shu.edu.cn)

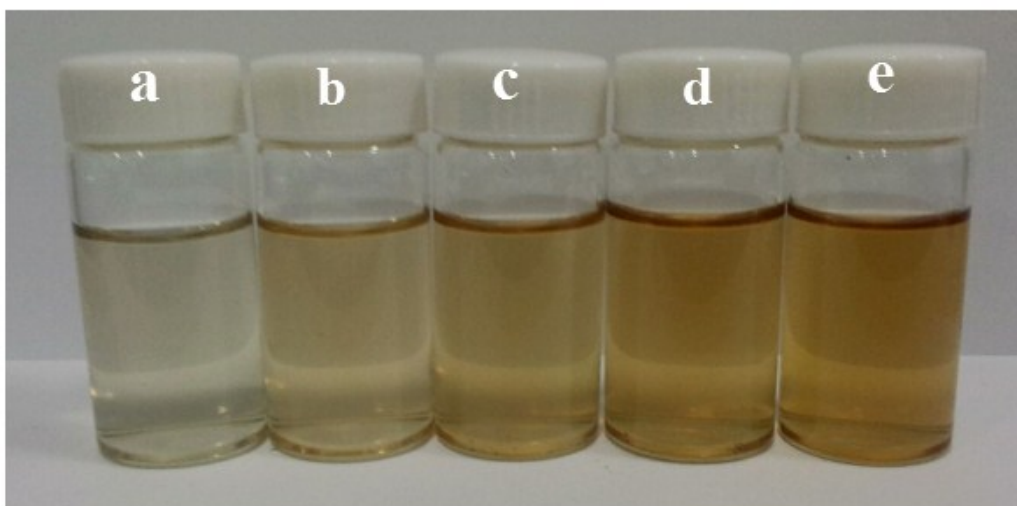

**Fig. S1.** Digital photographs of the PDA@NFC solutions treated with 0, 0.5, 1.0, 1.5, and 2.0 g/L of DPA dispersions.

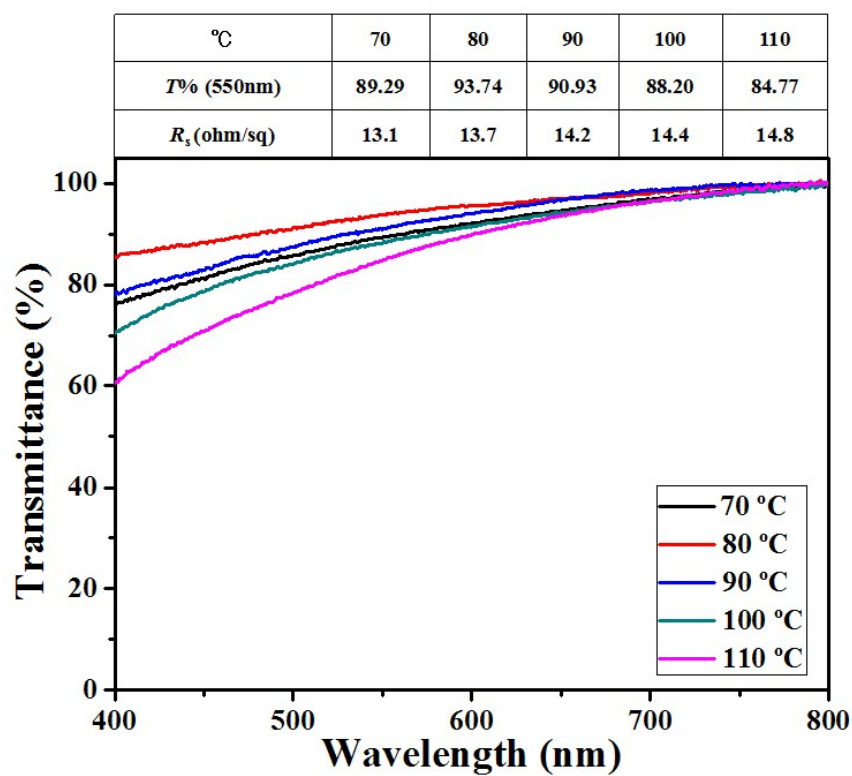

**Fig. S2.** Transparent conductive performance of PDA@NFC-AgNWs TCCNP at different drying temperature.

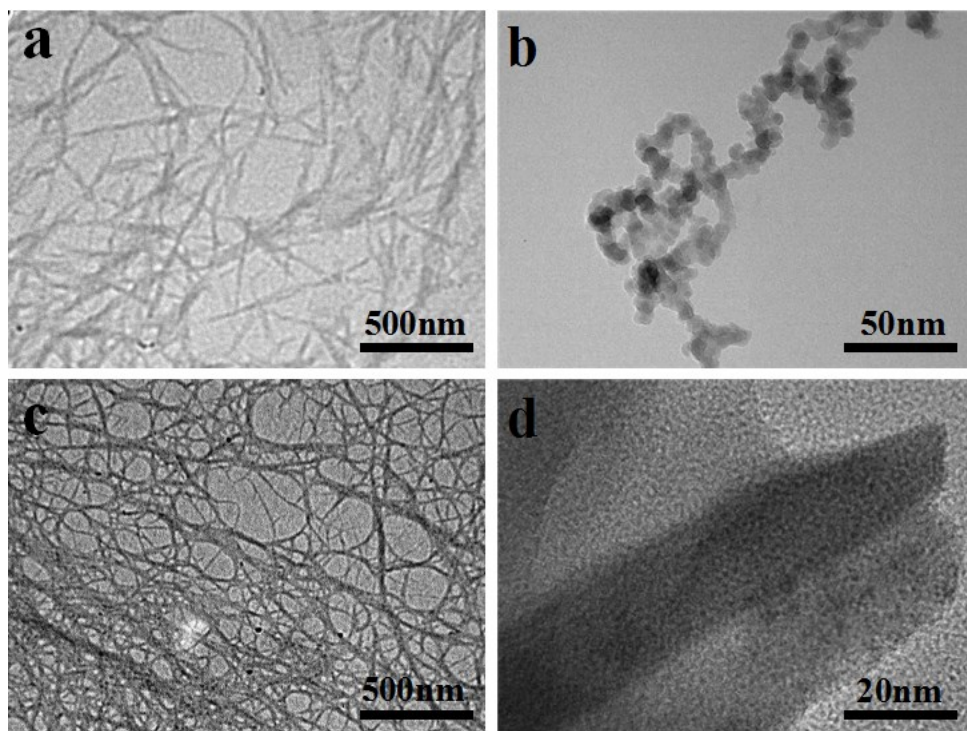

**Fig. S3.** TEM images of (a) NFC, (b) PDA and (c,d) PDA@NFC.

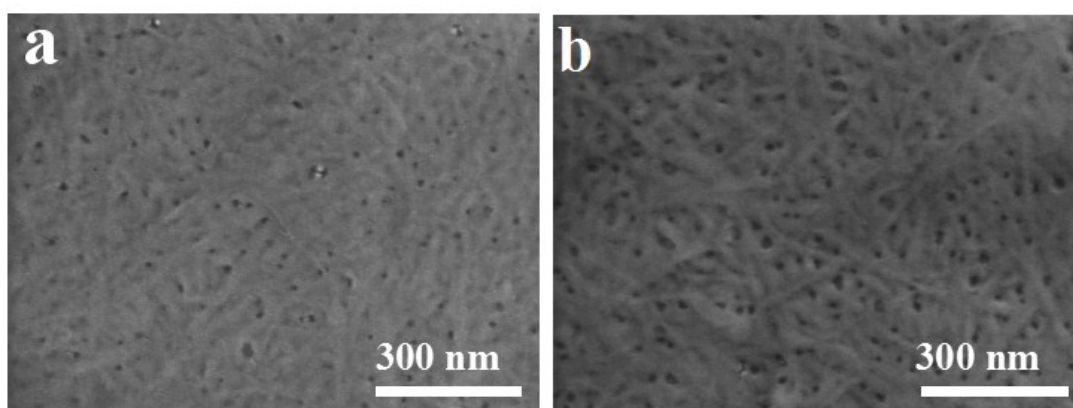

**Fig. S4.** SEM images of (a) NFC CNP and (b) PDA@NFC CNP.

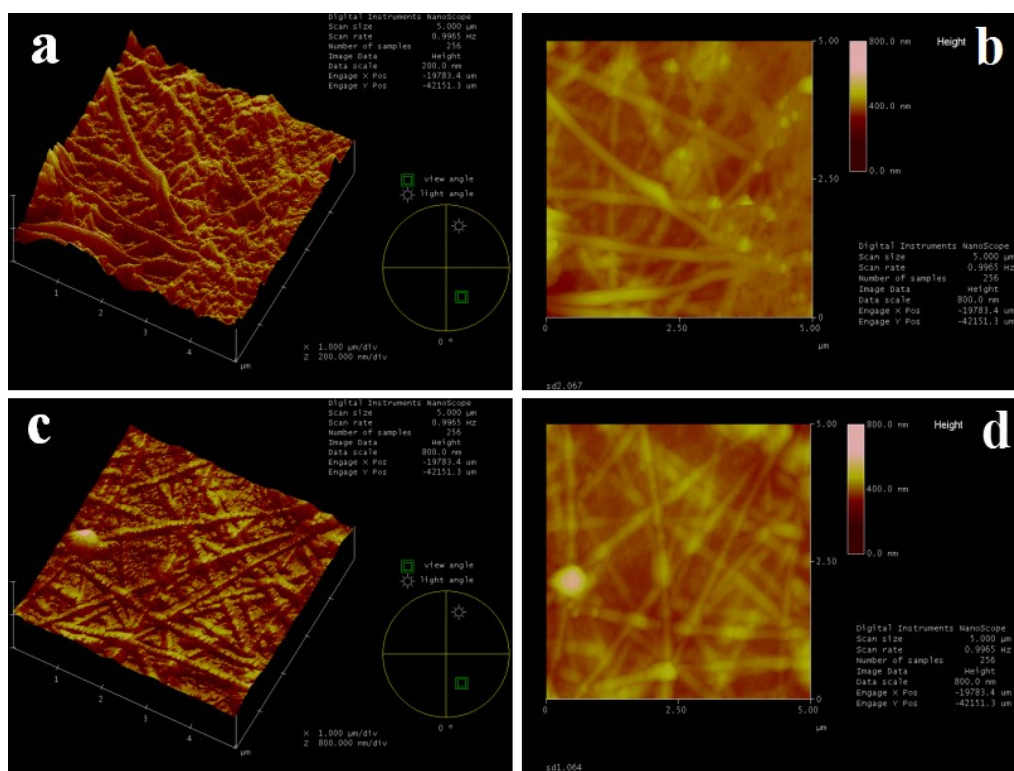

**Fig. S5.** AFM images of (a, b) NFC-AgNWs TCCNP and (c, d) PDA@NFC-AgNWs TCCNP.

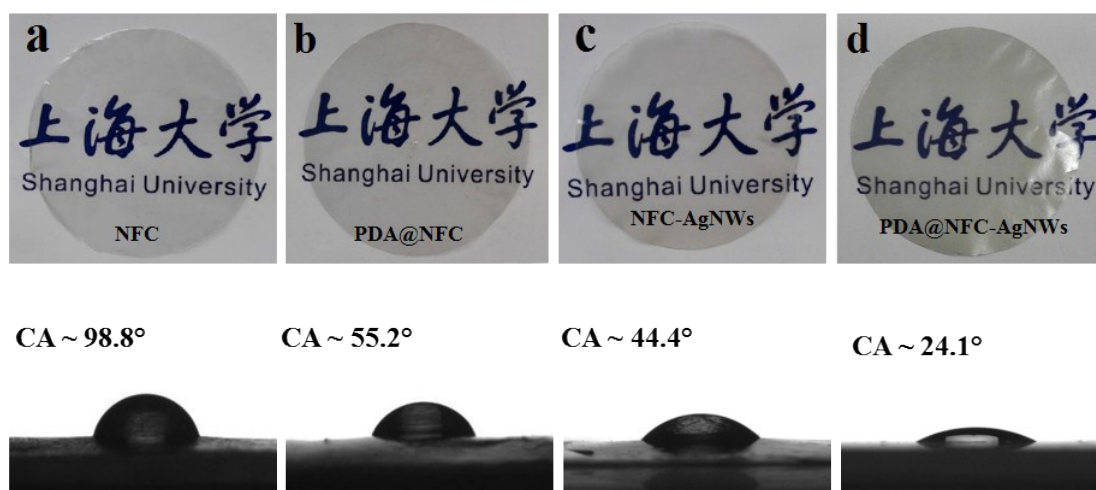

**Fig. S6.** Contact angles of (a) pristine NFC, (b) PDA@NFC, (c) NFC-AgNWs, and (d) PDA@NFC-AgNWs nanopapers.

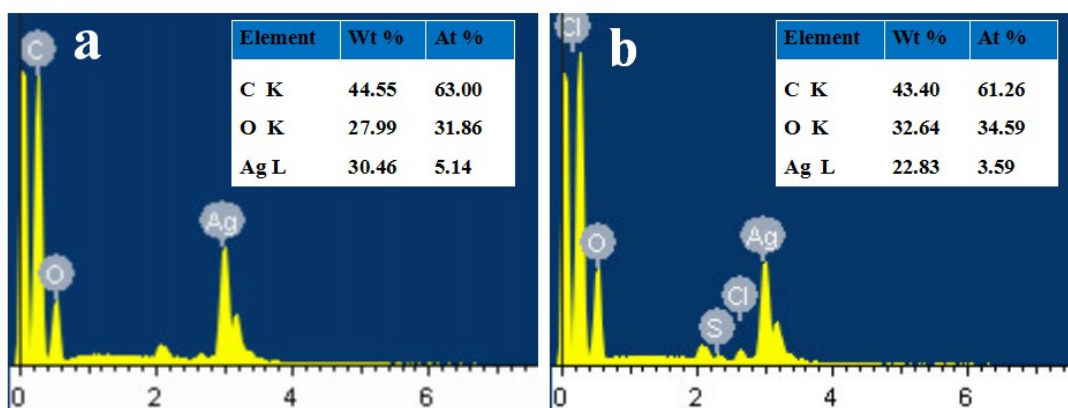

**Fig. S7.** Energy dispersive X-ray spectroscopy (EDS) spectra of the NFC-AgNWs TCCNP (a) before and (b) after exposure in air for 150 days.

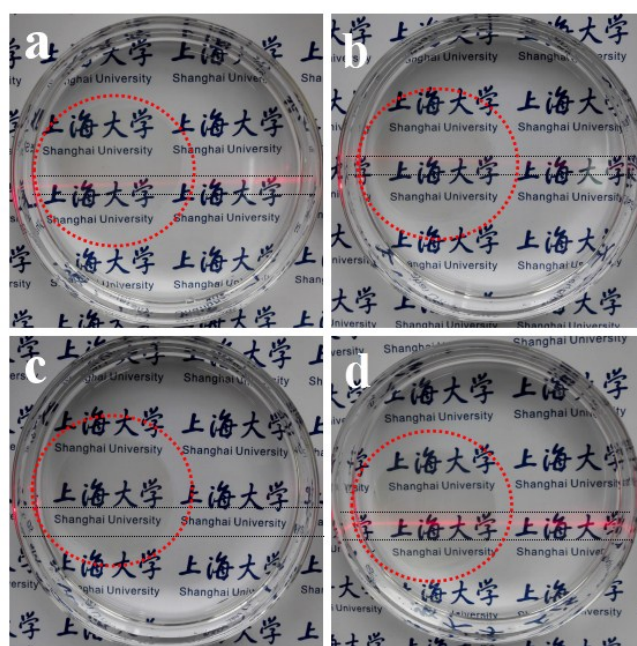

**Fig. S8.** Digital photographs of PDA@NFC-AgNWs TCCNP immersed in (a) pH=3, HNO<sub>3</sub> solution, (b) 4 wt% NaOH solution, (c) 4 wt% NaCl solution and (d) 4 wt% Na<sub>2</sub>S solution for 180 minutes, respectively.



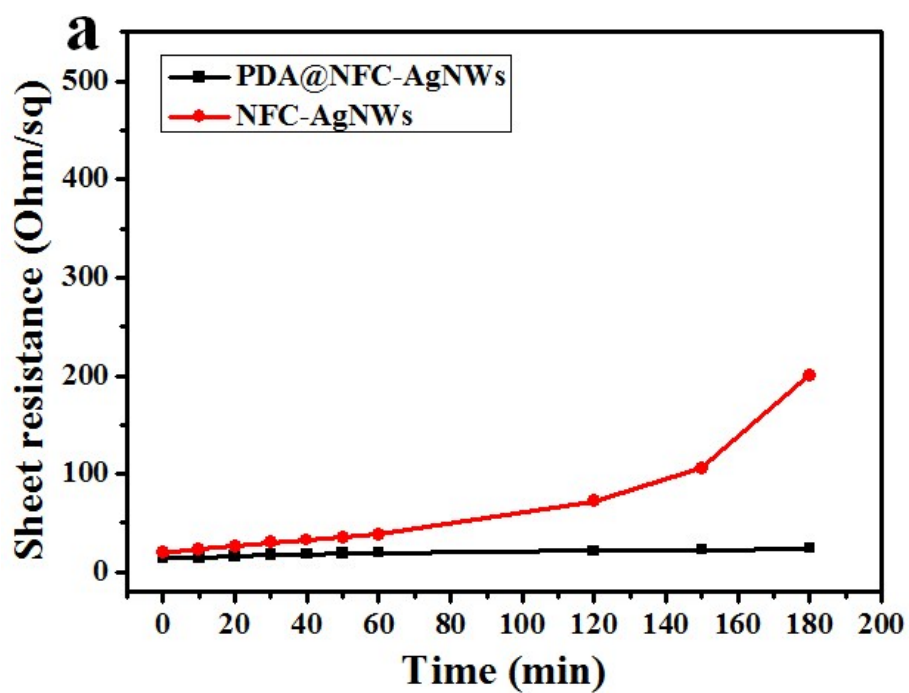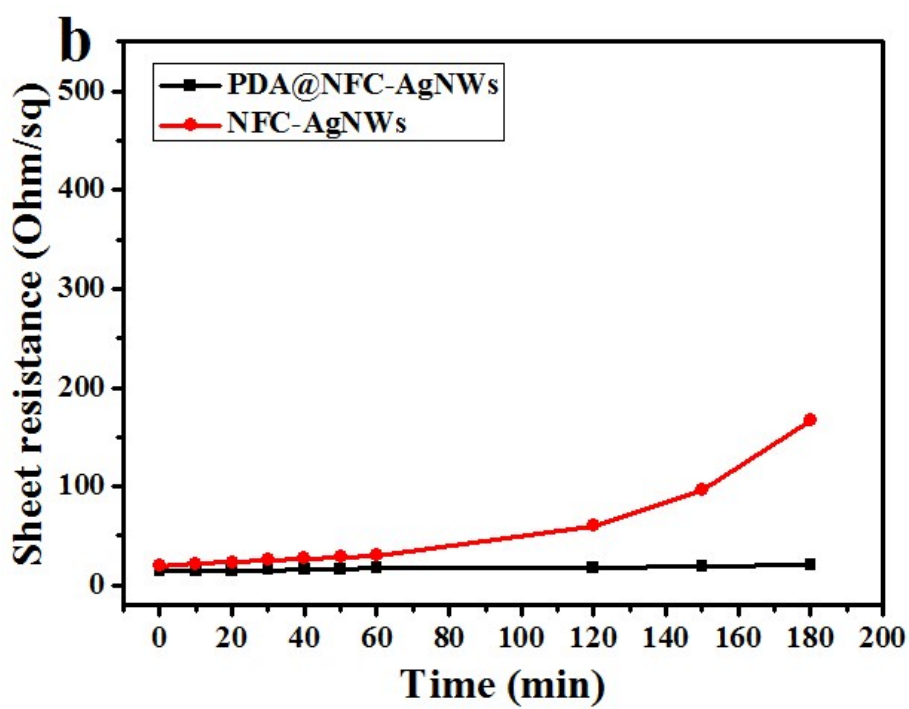

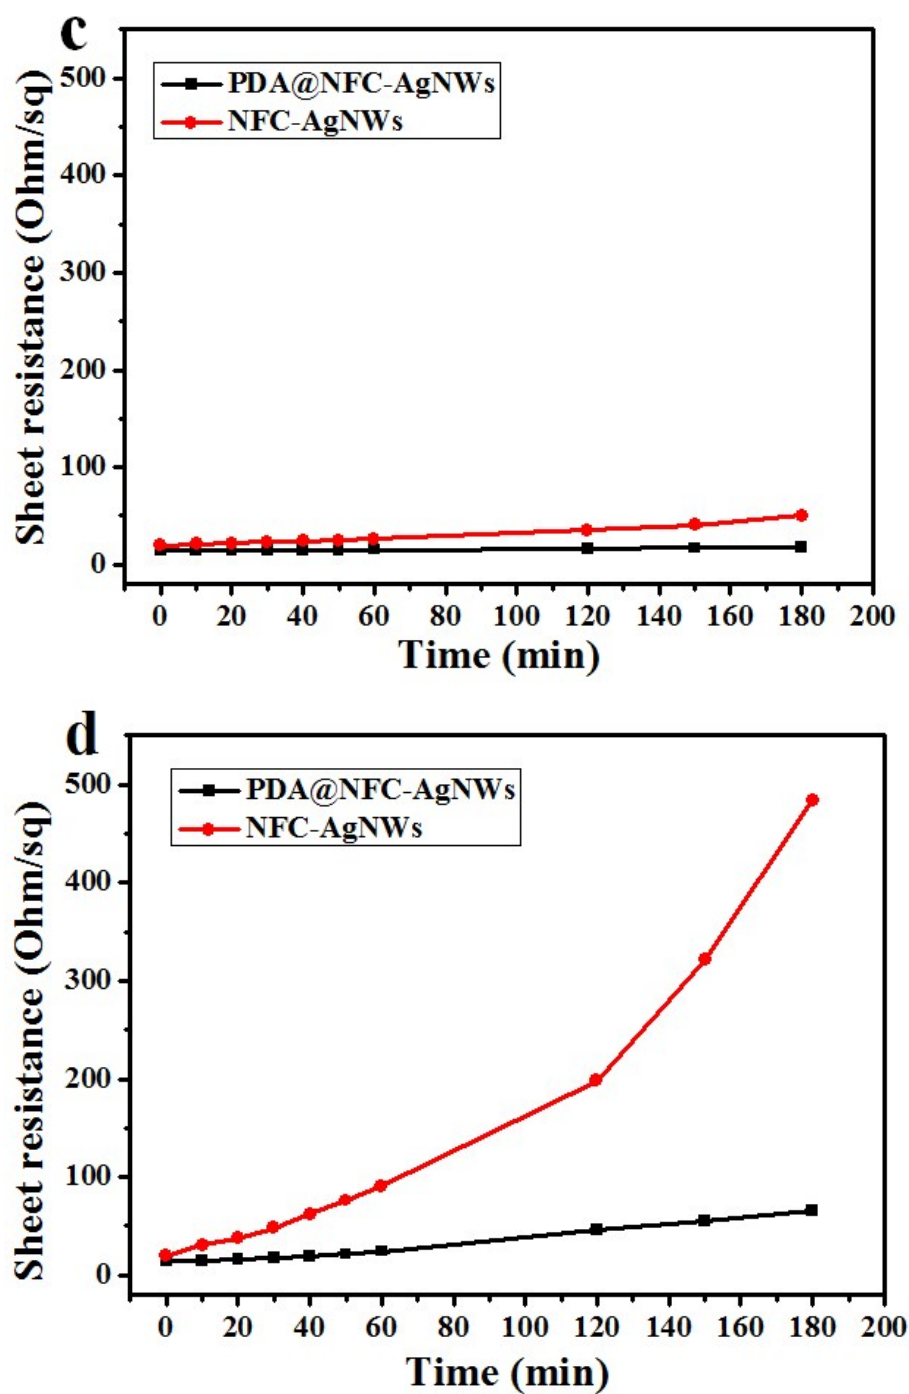

**Fig. S9.** Sheet resistance as a function of immersing time for NFC-AgNWs TCCNP and PDA@NFC-AgNWs TCCNP in (a) pH=3, HNO<sub>3</sub> solution, (b) 4 wt% NaOH solution, (c) 4 wt% NaCl solution and (d) 4 wt% Na<sub>2</sub>S solution, respectively.
